# Supplementary material
Source: publisher figshare collection journal article supplement (https://frontiersin.figshare.com/ndownloader/files/24315656)
Supplement: Supplementary file [file 24315656]

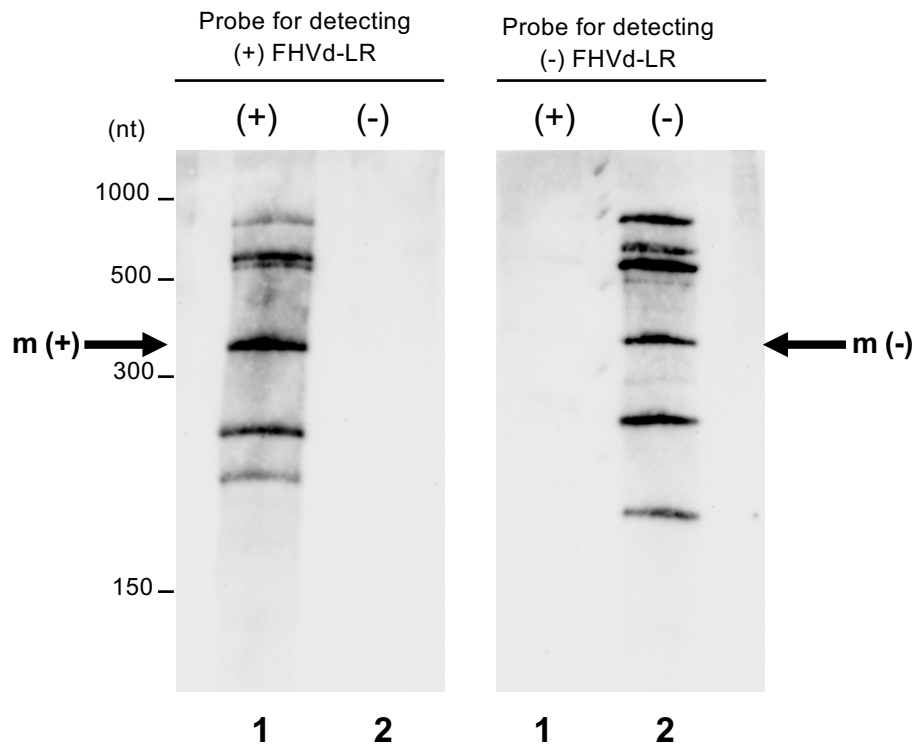

**Figure S4.** Northern-blot hybridization with equalized full-length digoxigenine-labeled riboprobes for detecting FHVd-LR (+) or (-) strands (left and right panel, respectively). In each panel, lanes 1 and 2 correspond to equal amounts of dimeric FHVd-LR (+) and (-) transcripts, respectively. Positions of the FHVd-LR (+) and (-) linear monomeric forms (m) are indicated by an arrow. Position and size (in nt) of the RNAs used as molecular markers are reported on the left.
